# Supplementary material for: Colorimetric multiplexed analysis of mercury and silver ions by using a unimolecular DNA probe and unmodified gold nanoparticles
Source: Royal Society of Chemistry journal article supplement (doi:10.1039/c2ay25521a), 2012-01-01
Supplement: c2ay25521a.pdf [file c2ay25521a.pdf]

## *Supporting Information*

### **Colorimetric multiplexed analysis of mercury and silver ions by using a unimolecular DNA probe and unmodified gold nanoparticles**

*Zhihe Qing, Xiaoxiao He\*, Kemin Wang \*, Zhen Zou, Xue Yang, Jin Huang and Genping Yan*

State Key Laboratory of Chemo/Biosensing and Chemometrics, College of Biology,  
College of Chemistry and Chemical Engineering, Hunan University, Key Laboratory  
for Bio-Nanotechnology and Molecule Engineering of Hunan Province, Changsha  
410082, P.R.China.

\*Address correspondence to these authors at: State Key Laboratory for Chemo/Biosensing and Chemometrics, College of Chemistry and Chemical Engineering, Hunan University, Changsha, 410082, P.R. China. Tel: 86-731-88821566; Fax: 86-731-88821566; E-mail: [kmwang@hnu.edu.cn](mailto:kmwang@hnu.edu.cn), [xiaoxiaohe@hnu.edu.cn](mailto:xiaoxiaohe@hnu.edu.cn)

Supplementary figures:

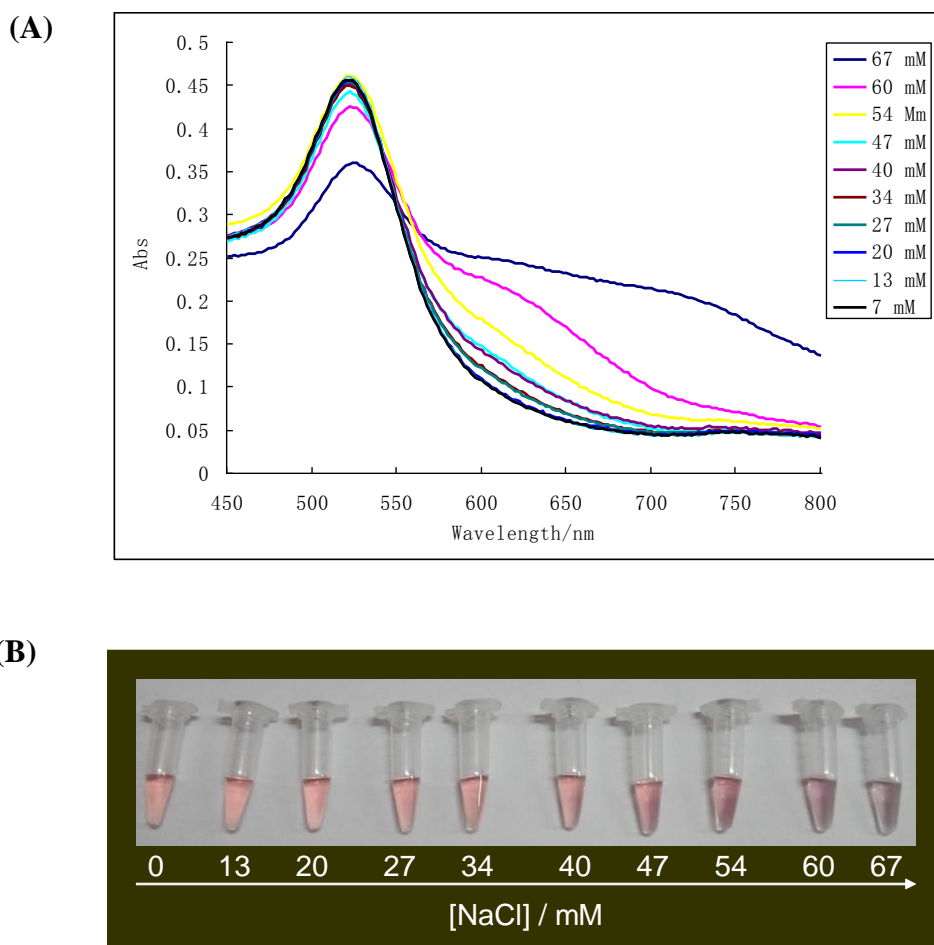

**Figure S1** (A) UV-vis absorption spectrum and (B) corresponding photograph of the UMDP absorbed AuNPs in the presence of different concentrations of NaCl. The corresponding concentrations were labeled at the bottom of the photograph.

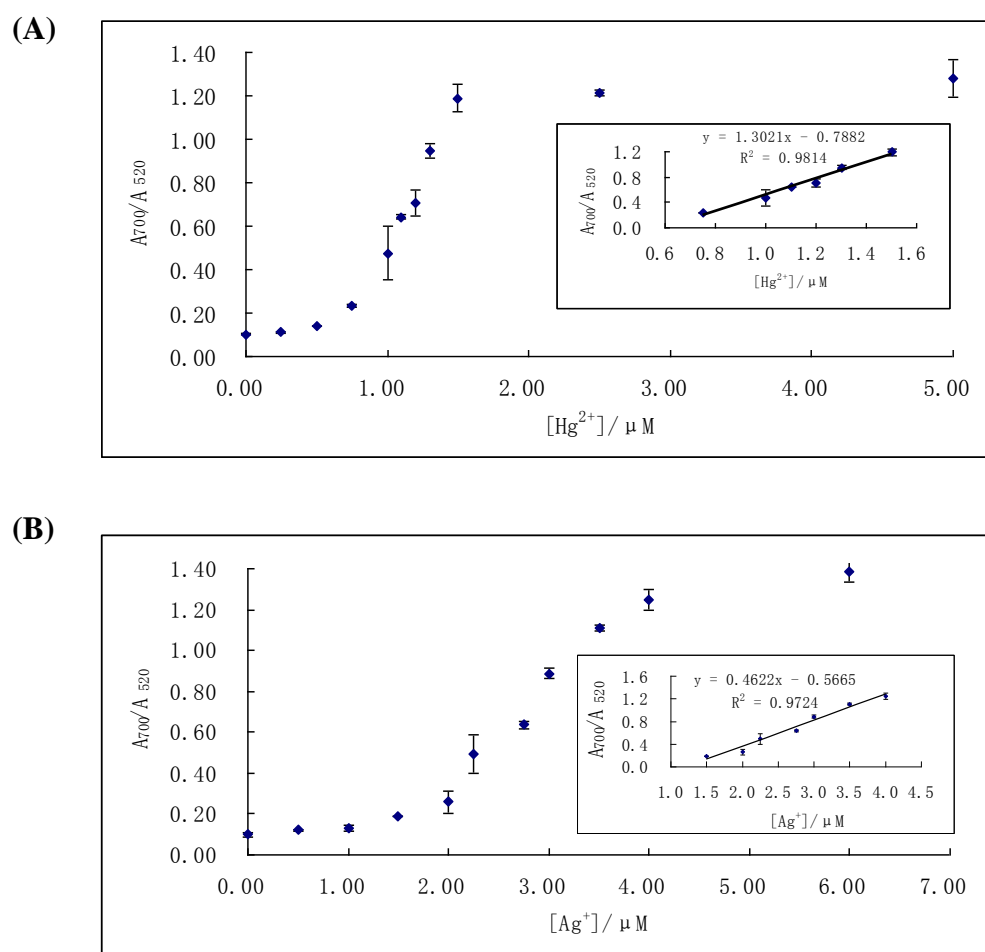

**Figure S2** Plot of absorption ratio ( $A_{700}/A_{520}$ ) of AuNPs solution versus  $Hg^{2+}$  (A) and  $Ag^+$  (B) ions concentrations. Inset: derived calibration curve. Error bars were obtained from three experiments.

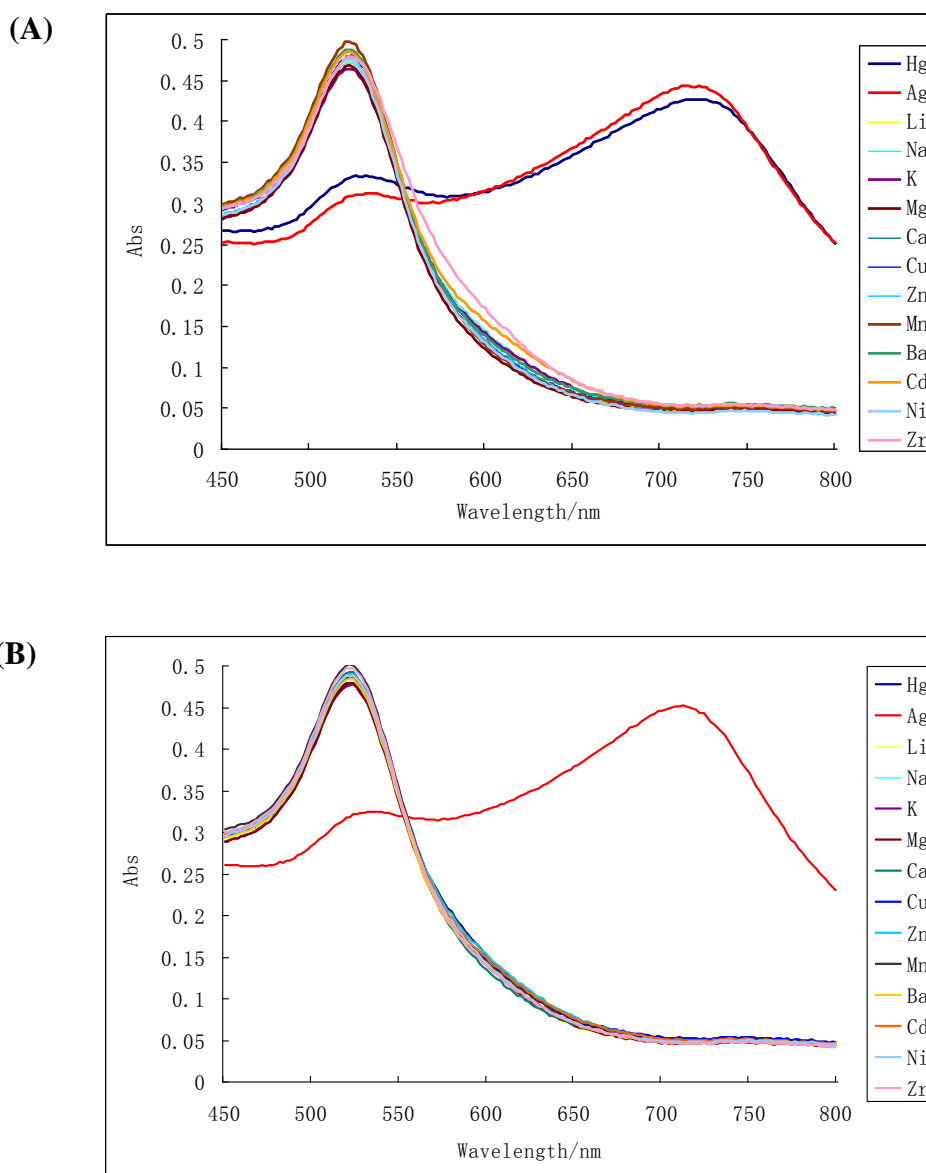

**Figure S3** UV - vis absorption spectra of AuNPs solution treated with different ions in the absence of EDTA (A) and in the presence of 100  $\mu\text{M}$  of EDTA (B). The concentration of  $\text{Hg}^{2+}$  and  $\text{Ag}^+$  ions was 5  $\mu\text{M}$ . The concentration of other metal ions was 50  $\mu\text{M}$ .

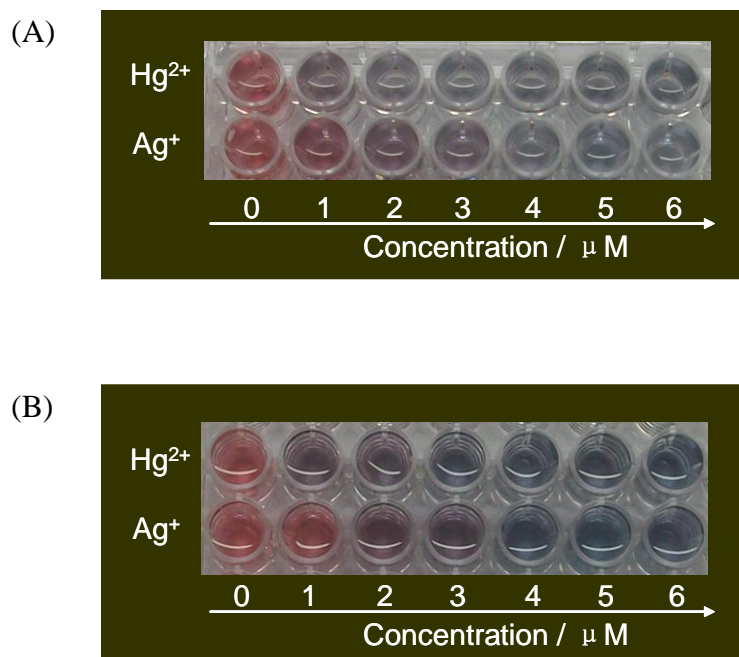

**Figure S4** Colorimetric response of the UMDP /AuNPs multiplexed sensing system in the presence of different concentrations of Hg<sup>2+</sup> and Ag<sup>+</sup> ions in the tap water (A) and the lake water (B). The corresponding concentrations were labeled at the bottom of the photograph.
